# Supplementary material for: Automated Rapid Estimation of Flood Depth using Digital Elevation Model and EOS-04 Satellite derived Flood inundation
Source: Copernicus journal article supplement (doi:10.5194/egusphere-2024-2278), 2024-10-25
Supplement: Supplementary file [file egusphere-2024-2278-AC1-supplement.pdf]

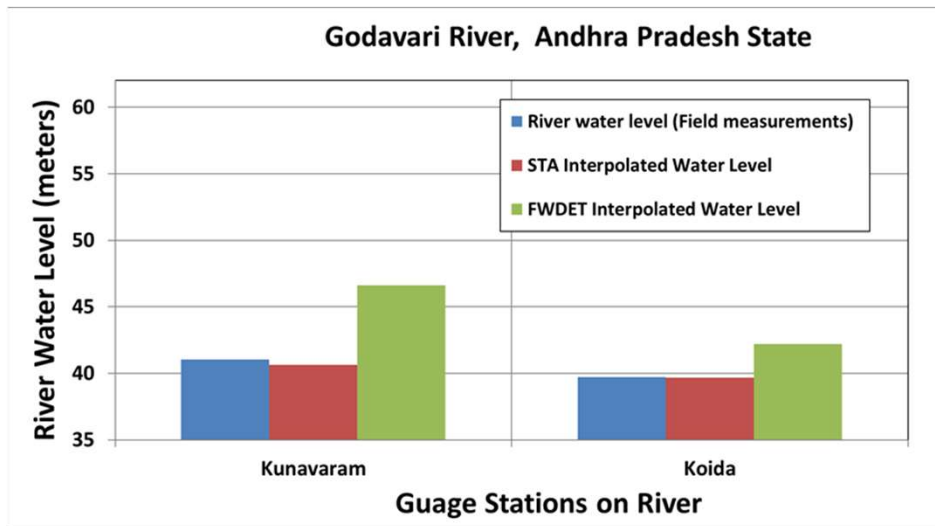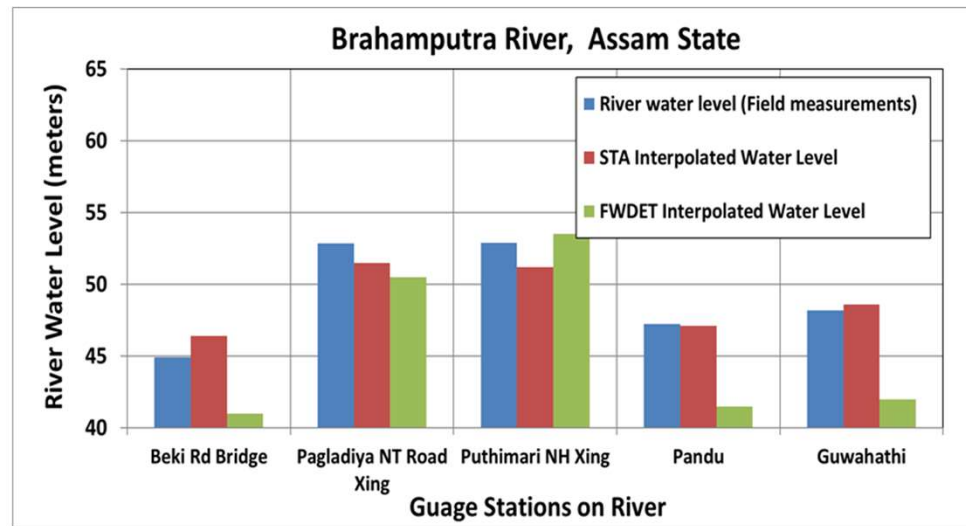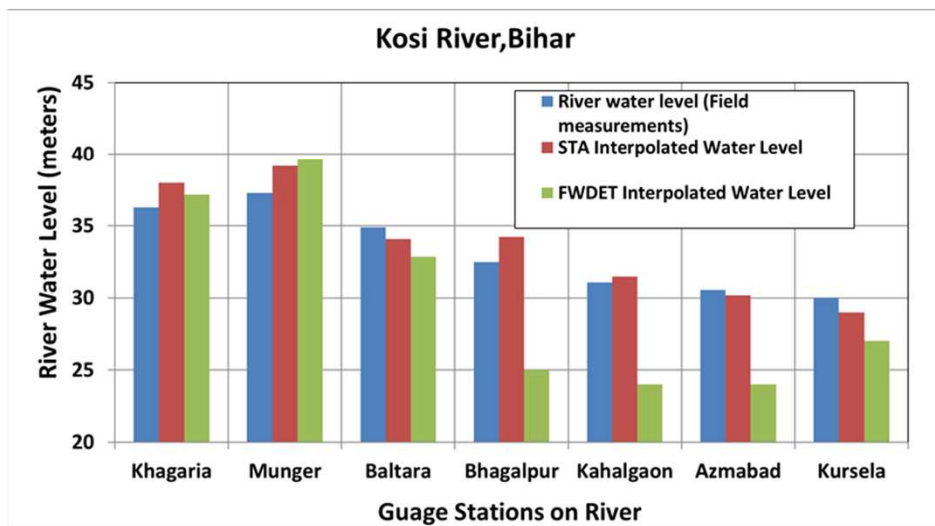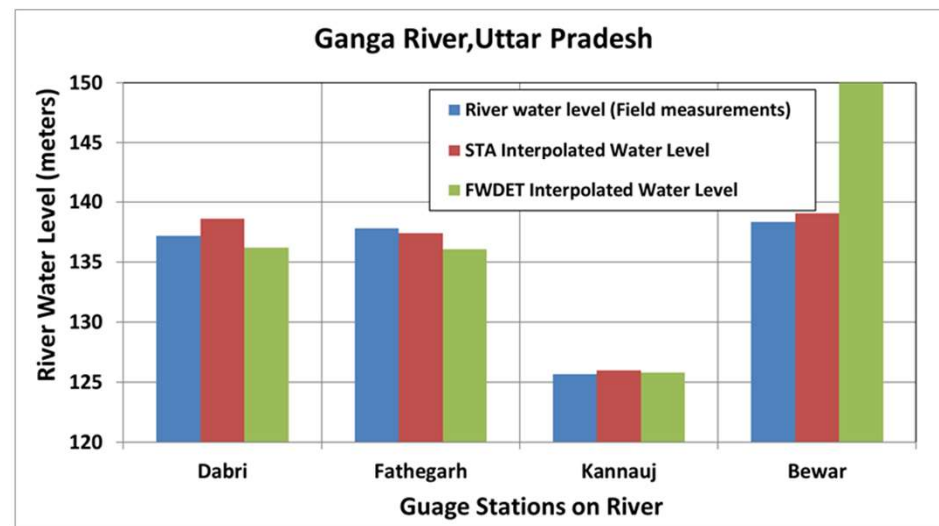

Figure.10. Comparison plots for water levels among field measured data, TSA and FWDET on all study areas
